# Supplementary material for: Surface hydroxyl groups regulate the osteogenic differentiation of mesenchymal stem cells on titanium and tantalum metals
Source: Royal Society of Chemistry journal article supplement (doi:10.1039/c7tb00111h), 2017-01-01
Supplement: c7tb00111h1.pdf [file c7tb00111h1.pdf]

## Supporting Information

### Surface Hydroxyl Groups Regulate the Osteogenic Differentiation of Mesenchymal Stem Cells on Titanium and Tantalum Metals

Mengfei Yu<sup>1,2,3,\*</sup>, Jiaying Gong<sup>1,\*</sup>, Ying Zhou<sup>1</sup>, Lingqing Dong<sup>1,2,★</sup>, Yihan Lin<sup>1</sup>, Liang Ma<sup>4</sup>, Wenjian Weng<sup>1,2</sup>, Kui Cheng<sup>1,2,★</sup> & Huiming Wang<sup>1,2,3,★</sup>

<sup>1</sup> The Affiliated Stomatologic Hospital, Zhejiang University, Hangzhou 310003, China.

<sup>2</sup> School of Materials Science and Engineering, State Key Laboratory of Silicon Materials, Cyrus Tang Center for Sensor Materials and Applications, Zhejiang University, Hangzhou 310027, China.

<sup>3</sup> The First Affiliated Hospital of Medical College, Zhejiang University, Hangzhou 310003, China.

<sup>4</sup> The State Key Laboratory of Fluid Power Transmission and Control, Zhejiang University, Hangzhou 310027, China.

\* These authors contributed equally to this work.

★Correspondence and requests for materials should be addressed to: lingqingdong@zju.edu.cn (L. Dong), chengkui@zju.edu.cn (K. Cheng) and hmwang1960@hotmail.com (H. Wang).

Table S1. Primer sequences for real-time PCR.

| <b>Gene</b> | <b>Primer sequences (5'-3')</b>                       |
|-------------|-------------------------------------------------------|
| Collagen I  | F: TCCTGCCGATGTCGCTATC<br>R: CAAGTCCGGTGTGACTCGTG     |
| Runx2       | F: GCTTCTCCAACCCACGAATG<br>R: GAACTGATAGGACGCTGACGA   |
| OCN         | F: AAAGCCCAGCGACTCT<br>R: CTAAACGGTGGTGCCATAGAT       |
| GAPDH       | F: GGCACAGTCAAGGCTGAGAATG<br>R: ATGGTGGTGAAGACGCCAGTA |

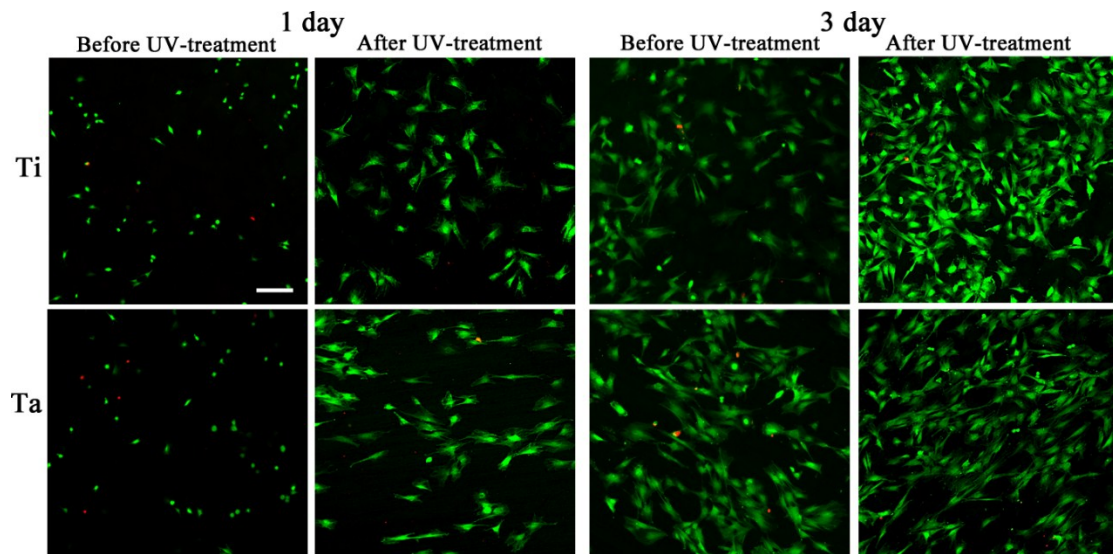

Figure S1. Viability of MSCs on Ti and Ta substrates (before and after UV treatment) after 1 day and 3 days of culture demonstrated by live-dead staining. All the images share one scale bar in the first image, 100  $\mu\text{m}$ .
